# Supplementary figures and images for: Fabrication of stable superabsorbent hydrogels for successful removal of crystal violet from waste water
Source: Royal Society of Chemistry journal article supplement (doi:10.1039/c9ra08079a), 2019-01-01

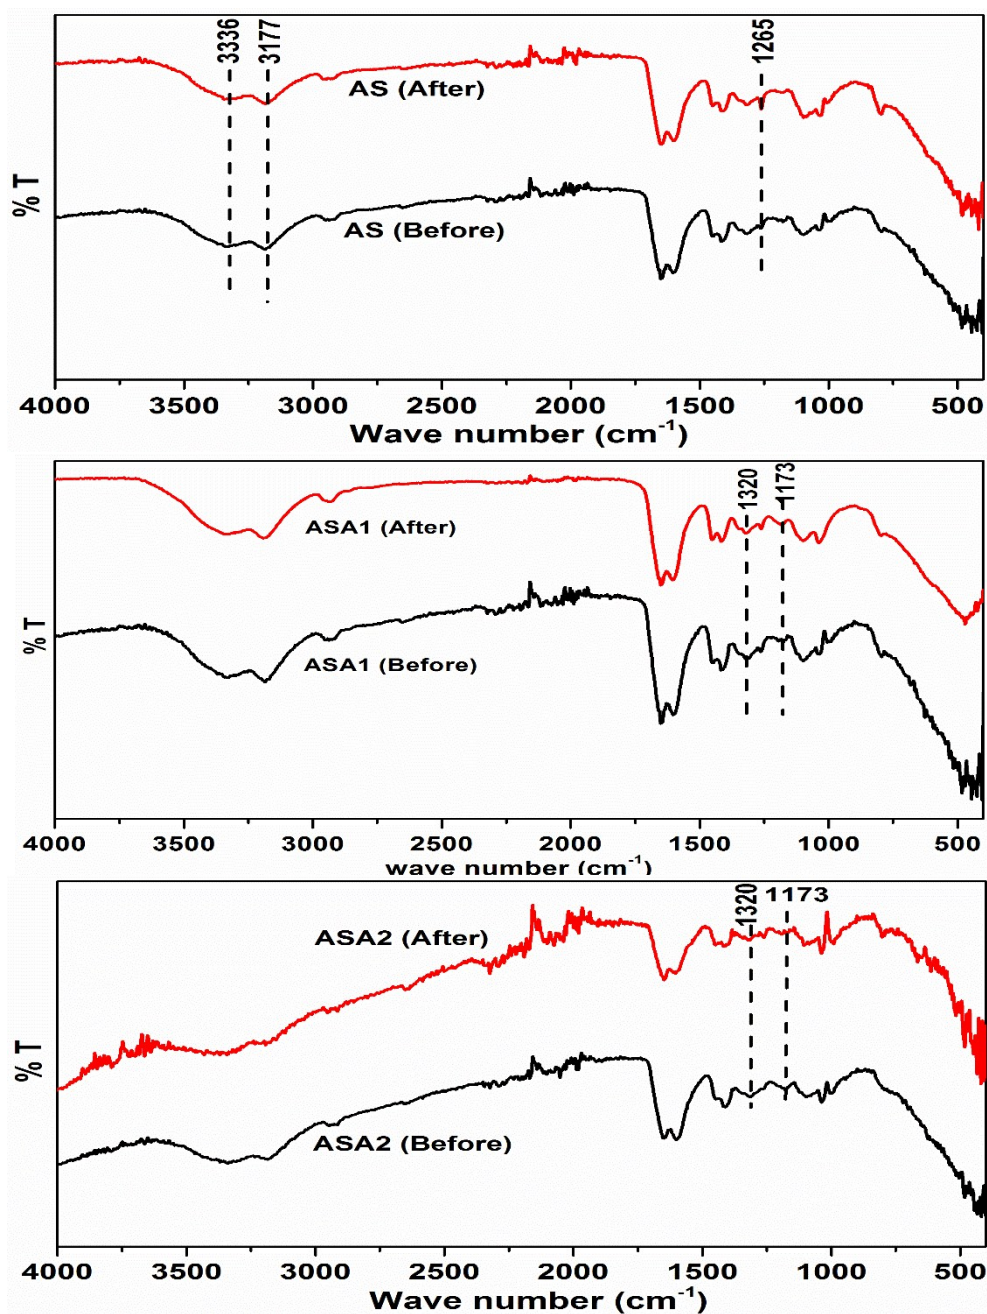

Fig. S1 FTIR spectra for prepared hydrogel samples before and after absorption of CV

Supplement: c9ra08079a1.pdf [file c9ra08079a1.pdf]
